# Supplementary material
Source: PubMed Central journal article supplement (PMC8570670)
Supplement: ntab100_suppl_supplementary_materials.pdf [file ntab100_suppl_supplementary_materials.pdf]

## **SUPPLEMENTAL MATERIALS**

**Supplemental Table 1. Demographics of European Americans in the ARIC dataset.**

| <b>Characteristics</b>        | <b>N</b> | <b>ARIC</b> |
|-------------------------------|----------|-------------|
| Age (mean±standard deviation) | 8,638    | 54.3±6      |
| Sex                           |          |             |
| Male (%)                      | 4,069    | 47          |
| Female (%)                    | 4,569    | 53          |
| Ever-never smoking            |          |             |
| Never (%)                     | 3,437    | 40          |
| Ever (%)                      | 5,197    | 60          |
| Age of smoking initiation     |          |             |
| Late (≥18) (%)                | 2,948    | 57          |
| Early (<18) (%)               | 2,232    | 43          |
| Cigarettes smoked per day     |          |             |
| Lighter smoking (<21) (%)     | 3,191    | 62          |
| Heavier smoking (≥21) (%)     | 1,983    | 38          |
| Smoking cessation             |          |             |
| Former (%)                    | 3,088    | 59          |
| Current (%)                   | 2,108    | 41          |

**Supplemental Table 2. Demographics of African Americans in the ARIC dataset.**

| <b>Characteristics</b>        | <b>N</b> | <b>ARIC</b> |
|-------------------------------|----------|-------------|
| Age (mean±standard deviation) | 2,412    | 53.4±6      |
| Sex                           |          |             |
| Male (%)                      | 914      | 38          |
| Female (%)                    | 1,498    | 62          |
| Ever-never smoking            |          |             |
| Never (%)                     | 1,097    | 46          |
| Ever (%)                      | 1,313    | 54          |
| Age of smoking initiation     |          |             |
| Late (≥18) (%)                | 788      | 62          |
| Early (<18) (%)               | 489      | 38          |
| Cigarettes smoked per day     |          |             |
| Lighter Smoking (<21) (%)     | 1,084    | 84          |
| Heavier Smoking (≥21) (%)     | 211      | 16          |
| Smoking Cessation             |          |             |
| Former (%)                    | 600      | 46          |
| Current (%)                   | 711      | 54          |

**Supplemental Table 3. Demographics of European Americans in the COGENE dataset.**

| Characteristics               | N     | ARIC   |
|-------------------------------|-------|--------|
| Age (mean±standard deviation) | 1,935 | 36.5±5 |
| Sex                           |       |        |
| Male (%)                      | 750   | 39     |
| Female (%)                    | 1,185 | 61     |
| Nicotine Dependence*          |       |        |
| Dependent (%)                 | 939   | 49     |
| Not dependent (%)             | 996   | 51     |
| Age of smoking initiation     |       |        |
| Late (≥14) (%)                | 1,070 | 55     |
| Early (<14) (%)               | 863   | 45     |
| Cigarettes smoked per day     |       |        |
| Lighter Smoking (<21) (%)     | 1,368 | 71     |
| Heavier Smoking (≥21) (%)     | 567   | 29     |
| Smoking Cessation             |       |        |
| Former (%)                    | 657   | 34     |
| Current (%)                   | 1,267 | 66     |

\*Nicotine dependence was defined as having a Fagerström Test for Nicotine Dependence (FTND) score of 4-10 while not being dependent on nicotine was defined as having an FTND score of 0 while having smoked at least 100 cigarettes lifetime (Heatherton, Kozlowski, Frecker, & Fagerstrom, 1991).

## REFERENCE

Heatherton, T. F., Kozlowski, L. T., Frecker, R. C., & Fagerstrom, K. O. (1991). The Fagerstrom Test for Nicotine Dependence: a revision of the Fagerstrom Tolerance Questionnaire. *Br J Addict*, 86(9), 1119-1127.

**Supplemental Table 4. The number of independent SNPs generating each PRS at different p-value thresholds within European Americans.**

| Outcomes                  | P-value Thresholds         |                            |                            |                            |                            |                            |                            |                            |
|---------------------------|----------------------------|----------------------------|----------------------------|----------------------------|----------------------------|----------------------------|----------------------------|----------------------------|
|                           | $\leq 5.00 \times 10^{-1}$ | $\leq 5.00 \times 10^{-2}$ | $\leq 5.00 \times 10^{-3}$ | $\leq 5.00 \times 10^{-4}$ | $\leq 5.00 \times 10^{-5}$ | $\leq 5.00 \times 10^{-6}$ | $\leq 5.00 \times 10^{-7}$ | $\leq 5.00 \times 10^{-8}$ |
| Ever smoking              | 86,480                     | 26,007                     | 7,168                      | 2,238                      | 922                        | 433                        | 233                        | 135                        |
| Age of smoking initiation | 86,440                     | 23,734                     | 4,687                      | 893                        | 195                        | 51                         | 17                         | 7                          |
| Cigarettes smoked per day | 86,494                     | 23,831                     | 4,904                      | 1,052                      | 273                        | 93                         | 48                         | 30                         |
| Smoking cessation         | 85,262                     | 21,662                     | 4,047                      | 699                        | 134                        | 34                         | 11                         | 6                          |

SNP – single nucleotide polymorphism; PRS – polygenic risk score.

**Supplemental Table 5. Models predicting each smoking phenotype within European Americans in the ARIC dataset.**

| Exposures                                              | Demographics Only             | Demographics Plus Genetic Ancestry         | Demographics Plus One PRS                  | Demographics Plus Genetic Ancestry and One PRS |
|--------------------------------------------------------|-------------------------------|--------------------------------------------|--------------------------------------------|------------------------------------------------|
|                                                        | OR [95% CI]                   | OR [95% CI]                                | OR [95% CI]                                | OR [95% CI]                                    |
| <b>Ever Smoking</b>                                    |                               |                                            |                                            |                                                |
| Age                                                    | 1.00 [0.99, 1.01]             | 1.00 [0.99, 1.01]                          | 1.00 [0.99, 1.01]                          | 1.00 [0.99, 1.01]                              |
| Sex - Female                                           | 0.39 [0.35, 0.42]             | 0.38 [0.35, 0.42]                          | 0.37 [0.34, 0.41]                          | 0.37 [0.34, 0.41]                              |
| PRS – Ever smoking                                     |                               |                                            | 1.37 [1.31, 1.44]                          | 1.37 [1.31, 1.43]                              |
| Model Prediction                                       | Pseudo R <sup>2</sup> = 0.068 | Pseudo R <sup>2</sup> = 0.080 <sup>a</sup> | Pseudo R <sup>2</sup> = 0.097 <sup>b</sup> | Pseudo R <sup>2</sup> = 0.107 <sup>c</sup>     |
| <b>Early Age of Smoking Initiation (&lt;18 years)</b>  |                               |                                            |                                            |                                                |
| Age                                                    | 0.99 [0.98, 1.00]             | 0.99 [0.98, 1.00]                          | 0.99 [0.98, 1.00]                          | 0.99 [0.98, 1.00]                              |
| Sex - Female                                           | 0.42 [0.38, 0.48]             | 0.42 [0.38, 0.47]                          | 0.42 [0.37, 0.47]                          | 0.42 [0.37, 0.47]                              |
| PRS – Age of smoking initiation                        |                               |                                            | 0.86 [0.82, 0.91]                          | 0.87 [0.82, 0.92]                              |
| Model Prediction                                       | Pseudo R <sup>2</sup> = 0.056 | Pseudo R <sup>2</sup> = 0.061 <sup>d</sup> | Pseudo R <sup>2</sup> = 0.062 <sup>e</sup> | Pseudo R <sup>2</sup> = 0.067 <sup>f</sup>     |
| <b>Heavier Smoking (≥21 cigarettes smoked per day)</b> |                               |                                            |                                            |                                                |
| Age                                                    | 0.97 [0.96, 0.98]             | 0.97 [0.96, 0.98]                          | 0.97 [0.96, 0.98]                          | 0.97 [0.96, 0.98]                              |
| Sex - Female                                           | 0.43 [0.38, 0.48]             | 0.42 [0.38, 0.48]                          | 0.42 [0.37, 0.48]                          | 0.42 [0.37, 0.47]                              |
| PRS – Cigarettes smoked per day                        |                               |                                            | 1.17 [1.10, 1.23]                          | 1.17 [1.11, 1.25]                              |
| Model Prediction                                       | Pseudo R <sup>2</sup> = 0.056 | Pseudo R <sup>2</sup> = 0.059 <sup>g</sup> | Pseudo R <sup>2</sup> = 0.063 <sup>h</sup> | Pseudo R <sup>2</sup> = 0.066 <sup>i</sup>     |
| <b>Smoking Cessation</b>                               |                               |                                            |                                            |                                                |
| Age                                                    | 0.97 [0.96, 0.98]             | 0.97 [0.96, 0.98]                          | 0.97 [0.96, 0.98]                          | 0.97 [0.96, 0.98]                              |
| Sex - Female                                           | 2.00 [1.79, 2.24]             | 2.01 [1.79, 2.25]                          | 2.01 [1.79, 2.25]                          | 2.01 [1.79, 2.25]                              |
| PRS – Smoking cessation                                |                               |                                            | 1.23 [1.16, 1.30]                          | 1.24 [1.17, 1.32]                              |
| Model Prediction                                       | Pseudo R <sup>2</sup> = 0.047 | Pseudo R <sup>2</sup> = 0.055 <sup>j</sup> | Pseudo R <sup>2</sup> = 0.060 <sup>k</sup> | Pseudo R <sup>2</sup> = 0.069 <sup>l</sup>     |

PRS – polygenic risk score; OR – odds ratio; CI – confidence interval.

The reference for sex is male.

The PRSs are in z-scores. The reference group for each PRS is a z-score of 0. Each OR represents a 1 standard deviation increase in PRS z-score.

<sup>a</sup>The  $X^2$  statistic from the likelihood ratio test when comparing to the demographics only model is 81.17 with 10 degrees of freedom and a corresponding p-value of <0.0001.

<sup>b</sup>The  $X^2$  statistic from the likelihood ratio test when comparing to the demographics **only** model is 192.31 with 1 degree of freedom and a corresponding p-value of <0.0001.

<sup>c</sup>The  $X^2$  statistic from the likelihood ratio test when comparing to the demographics **only** model is 264.80 with 11 degrees of freedom and a corresponding p-value of <0.0001.

<sup>d</sup>The  $X^2$  statistic from the likelihood ratio test when comparing to the demographics only model is 20.68 with 10 degrees of freedom and a corresponding p-value of 0.0235.

<sup>e</sup>The  $X^2$  statistic from the likelihood ratio test when comparing to the demographics **only** model is 25.62 with 1 degree of freedom and a corresponding p-value of <0.0001.

<sup>f</sup>The  $X^2$  statistic from the likelihood ratio test when comparing to the demographics **only** model is 44.19 with 11 degrees of freedom and a corresponding p-value of <0.0001.

<sup>g</sup>The  $X^2$  statistic from the likelihood ratio test when comparing to the demographics only model is 8.94 with 10 degrees of freedom and a corresponding p-value of 0.5375.

<sup>h</sup>The  $X^2$  statistic from the likelihood ratio test when comparing to the demographics **only** model is 27.67 with 1 degree of freedom and a corresponding p-value of <0.0001.

<sup>i</sup>The  $X^2$  statistic from the likelihood ratio test when comparing to the demographics **only** model is 38.11 with 11 degrees of freedom and a corresponding p-value of 0.0001.

<sup>j</sup>The  $X^2$  statistic from the likelihood ratio test when comparing to the demographics only model is 32.23 with 10 degrees of freedom and a corresponding p-value of 0.0004.

<sup>k</sup>The  $X^2$  statistic from the likelihood ratio test when comparing to the demographics **only** model is 51.53 with 1 degree of freedom and a corresponding p-value of <0.0001.

<sup>l</sup>The  $X^2$  statistic from the likelihood ratio test when comparing to the demographics **only** model is 85.21 with 11 degrees of freedom and a corresponding p-value of <0.0001.

**Supplemental Table 6. Models predicting each smoking phenotype within European Americans in the COGENE dataset.**

| Exposures                                              | Demographics Only             | Demographics Plus Genetic Ancestry         | Demographics Plus One PRS                  | Demographics Plus Genetic Ancestry and One PRS |
|--------------------------------------------------------|-------------------------------|--------------------------------------------|--------------------------------------------|------------------------------------------------|
|                                                        | OR [95% CI]                   | OR [95% CI]                                | OR [95% CI]                                | OR [95% CI]                                    |
| <b>Nicotine Dependence</b>                             |                               |                                            |                                            |                                                |
| Age                                                    | 1.04 [1.02, 1.06]             | 1.04 [1.02, 1.06]                          | 1.04 [1.02, 1.06]                          | 1.04 [1.02, 1.06]                              |
| Sex - Female                                           | 0.52 [0.43, 0.62]             | 0.52 [0.43, 0.63]                          | 0.51 [0.42, 0.61]                          | 0.51 [0.42, 0.62]                              |
| PRS – Cigarettes smoked per day                        |                               |                                            | 1.45 [1.32, 1.60]                          | 1.51 [1.37, 1.67]                              |
| Model Prediction                                       | Pseudo R <sup>2</sup> = 0.045 | Pseudo R <sup>2</sup> = 0.064 <sup>a</sup> | Pseudo R <sup>2</sup> = 0.086 <sup>b</sup> | Pseudo R <sup>2</sup> = 0.108 <sup>c</sup>     |
| <b>Early Age of Smoking Initiation (&lt;14 years)</b>  |                               |                                            |                                            |                                                |
| Age                                                    | 1.03 [1.01, 1.05]             | 1.03 [1.01, 1.05]                          | 1.03 [1.01, 1.05]                          | 1.03 [1.01, 1.05]                              |
| Sex - Female                                           | 0.83 [0.69, 1.00]             | 0.83 [0.69, 1.00]                          | 0.83 [0.69, 1.00]                          | 0.83 [0.69, 1.00]                              |
| PRS – Age of smoking initiation                        |                               |                                            | 0.85 [0.78, 0.93]                          | 0.85 [0.77, 0.93]                              |
| Model Prediction                                       | Pseudo R <sup>2</sup> = 0.011 | Pseudo R <sup>2</sup> = 0.017 <sup>d</sup> | Pseudo R <sup>2</sup> = 0.020 <sup>e</sup> | Pseudo R <sup>2</sup> = 0.026 <sup>f</sup>     |
| <b>Heavier Smoking (≥21 cigarettes smoked per day)</b> |                               |                                            |                                            |                                                |
| Age                                                    | 1.05 [1.03, 1.07]             | 1.05 [1.03, 1.07]                          | 1.05 [1.03, 1.07]                          | 1.05 [1.03, 1.07]                              |
| Sex - Female                                           | 0.42 [0.34, 0.51]             | 0.42 [0.34, 0.51]                          | 0.41 [0.34, 0.50]                          | 0.41 [0.34, 0.51]                              |
| PRS – Cigarettes smoked per day                        |                               |                                            | 1.27 [1.14, 1.40]                          | 1.30 [1.17, 1.45]                              |
| Model Prediction                                       | Pseudo R <sup>2</sup> = 0.070 | Pseudo R <sup>2</sup> = 0.078 <sup>g</sup> | Pseudo R <sup>2</sup> = 0.084 <sup>h</sup> | Pseudo R <sup>2</sup> = 0.094 <sup>i</sup>     |
| <b>Smoking Cessation</b>                               |                               |                                            |                                            |                                                |
| Age                                                    | 1.00 [0.99, 1.01]             | 1.00 [0.98, 1.01]                          | 1.00 [0.98, 1.01]                          | 1.00 [0.98, 1.01]                              |
| Sex - Female                                           | 0.56 [0.46, 0.69]             | 0.57 [0.47, 0.70]                          | 0.56 [0.46, 0.69]                          | 0.57 [0.47, 0.70]                              |
| PRS – Smoking cessation                                |                               |                                            | 1.35 [1.23, 1.49]                          | 1.35 [1.22, 1.49]                              |
| Model Prediction                                       | Pseudo R <sup>2</sup> = 0.023 | Pseudo R <sup>2</sup> = 0.043 <sup>j</sup> | Pseudo R <sup>2</sup> = 0.049 <sup>k</sup> | Pseudo R <sup>2</sup> = 0.066 <sup>l</sup>     |



PRS – polygenic risk score; OR – odds ratio; CI – confidence interval.

The reference for sex is male.

The PRSs are in z-scores. The reference group for each PRS is a z-score of 0. Each OR represents a 1 standard deviation increase in PRS z-score.

<sup>a</sup>The  $X^2$  statistic from the likelihood ratio test when comparing to the demographics only model is 27.42 with 10 degrees of freedom and a corresponding p-value of 0.0022.

<sup>b</sup>The  $X^2$  statistic from the likelihood ratio test when comparing to the demographics **only** model is 62.07 with 1 degree of freedom and a corresponding p-value of <0.0001.

<sup>c</sup>The  $X^2$  statistic from the likelihood ratio test when comparing to the demographics **only** model is 96.67 with 11 degrees of freedom and a corresponding p-value of <0.0001.

<sup>d</sup>The  $X^2$  statistic from the likelihood ratio test when comparing to the demographics only model is 9.23 with 10 degrees of freedom and a corresponding p-value of 0.5100.

<sup>e</sup>The  $X^2$  statistic from the likelihood ratio test when comparing to the demographics **only** model is 12.45 with 1 degree of freedom and a corresponding p-value of 0.0004.

<sup>f</sup>The  $X^2$  statistic from the likelihood ratio test when comparing to the demographics **only** model is 21.18 with 11 degrees of freedom and a corresponding p-value of 0.0316.

<sup>g</sup>The  $X^2$  statistic from the likelihood ratio test when comparing to the demographics only model is 11.01 with 10 degrees of freedom and a corresponding p-value of 0.3497.

<sup>h</sup>The  $X^2$  statistic from the likelihood ratio test when comparing to the demographics **only** model is 20.65 with 1 degree of freedom and a corresponding p-value of <0.0001.

<sup>i</sup>The  $X^2$  statistic from the likelihood ratio test when comparing to the demographics **only** model is 34.56 with 11 degrees of freedom and a corresponding p-value of 0.0003.

<sup>j</sup>The  $X^2$  statistic from the likelihood ratio test when comparing to the demographics only model is 28.03 with 10 degrees of freedom and a corresponding p-value of 0.0018.

<sup>k</sup>The  $X^2$  statistic from the likelihood ratio test when comparing to the demographics **only** model is 37.47 with 1 degree of freedom and a corresponding p-value of <0.0001.

<sup>l</sup>The  $X^2$  statistic from the likelihood ratio test when comparing to the demographics **only** model is 62.22 with 11 degrees of freedom and a corresponding p-value of <0.0001.

**Supplemental Table 7. Models predicting each smoking phenotype within African Americans in the ARIC dataset.**

| Exposures                                              | Demographics Only             | Demographics Plus Genetic Ancestry         | Demographics Plus One PRS                  | Demographics Plus Genetic Ancestry and One PRS |
|--------------------------------------------------------|-------------------------------|--------------------------------------------|--------------------------------------------|------------------------------------------------|
|                                                        | OR [95% CI]                   | OR [95% CI]                                | OR [95% CI]                                | OR [95% CI]                                    |
| <b>Ever Smoking</b>                                    |                               |                                            |                                            |                                                |
| Age                                                    | 1.01 [1.00, 1.03]             | 1.01 [1.00, 1.03]                          | 1.01 [1.00, 1.03]                          | 1.01 [1.00, 1.03]                              |
| Sex - Female                                           | 0.33 [0.27, 0.39]             | 0.33 [0.27, 0.39]                          | 0.33 [0.27, 0.39]                          | 0.33 [0.27, 0.39]                              |
| PRS – Ever smoking                                     |                               |                                            | 1.08 [1.00, 1.18]                          | 1.09 [1.00, 1.20]                              |
| Model Prediction                                       | Pseudo R <sup>2</sup> = 0.090 | Pseudo R <sup>2</sup> = 0.099 <sup>a</sup> | Pseudo R <sup>2</sup> = 0.092 <sup>b</sup> | Pseudo R <sup>2</sup> = 0.101 <sup>c</sup>     |
| <b>Early Age of Smoking Initiation (&lt;18 years)</b>  |                               |                                            |                                            |                                                |
| Age                                                    | 1.01 [0.99, 1.03]             | 1.01 [0.99, 1.03]                          | 1.01 [0.99, 1.03]                          | 1.01 [0.99, 1.03]                              |
| Sex - Female                                           | 0.50 [0.40, 0.64]             | 0.50 [0.40, 0.63]                          | 0.51 [0.40, 0.64]                          | 0.50 [0.40, 0.63]                              |
| PRS – Age of smoking initiation                        |                               |                                            | 0.93 [0.83, 1.04]                          | 0.93 [0.83, 1.04]                              |
| Model Prediction                                       | Pseudo R <sup>2</sup> = 0.038 | Pseudo R <sup>2</sup> = 0.044 <sup>d</sup> | Pseudo R <sup>2</sup> = 0.040 <sup>e</sup> | Pseudo R <sup>2</sup> = 0.046 <sup>f</sup>     |
| <b>Heavier Smoking (≥21 cigarettes smoked per day)</b> |                               |                                            |                                            |                                                |
| Age                                                    | 1.00 [0.98, 1.03]             | 1.00 [0.98, 1.03]                          | 1.00 [0.97, 1.03]                          | 1.00 [0.98, 1.03]                              |
| Sex - Female                                           | 0.40 [0.29, 0.55]             | 0.40 [0.29, 0.55]                          | 0.40 [0.29, 0.55]                          | 0.40 [0.29, 0.55]                              |
| PRS – Cigarettes smoked per day                        |                               |                                            | 0.94 [0.81, 1.09]                          | 0.94 [0.76, 1.15]                              |
| Model Prediction                                       | Pseudo R <sup>2</sup> = 0.045 | Pseudo R <sup>2</sup> = 0.063 <sup>g</sup> | Pseudo R <sup>2</sup> = 0.046 <sup>h</sup> | Pseudo R <sup>2</sup> = 0.064 <sup>i</sup>     |
| <b>Smoking Cessation</b>                               |                               |                                            |                                            |                                                |
| Age                                                    | 0.97 [0.95, 0.99]             | 0.97 [0.95, 0.98]                          | 0.97 [0.95, 0.99]                          | 0.97 [0.95, 0.98]                              |
| Sex - Female                                           | 1.21 [0.98, 1.52]             | 1.21 [0.97, 1.51]                          | 1.22 [0.98, 1.52]                          | 1.21 [0.97, 1.51]                              |
| PRS – Smoking cessation                                |                               |                                            | 0.98 [0.87, 1.09]                          | 0.96 [0.83, 1.12]                              |
| Model Prediction                                       | Pseudo R <sup>2</sup> = 0.016 | Pseudo R <sup>2</sup> = 0.033 <sup>j</sup> | Pseudo R <sup>2</sup> = 0.016 <sup>k</sup> | Pseudo R <sup>2</sup> = 0.034 <sup>l</sup>     |

PRS – polygenic risk score; OR – odds ratio; CI – confidence interval.

The reference for sex is male.

The PRSs are in z-scores. The reference group for each PRS is a z-score of 0. Each OR represents a 1 standard deviation increase in PRS z-score.

<sup>a</sup>The  $X^2$  statistic from the likelihood ratio test when comparing to the demographics only model is 17.64 with 10 degrees of freedom and a corresponding p-value of 0.0613.

<sup>b</sup>The  $X^2$  statistic from the likelihood ratio test when comparing to the demographics only model is 3.81 with 1 degree of freedom and a corresponding p-value of 0.0509.

<sup>c</sup>The  $X^2$  statistic from the likelihood ratio test when comparing to the demographics only model is 21.54 with 11 degrees of freedom and a corresponding p-value of 0.0282.

<sup>d</sup>The  $X^2$  statistic from the likelihood ratio test when comparing to the demographics only model is 5.79 with 10 degrees of freedom and a corresponding p-value of 0.8326.

<sup>e</sup>The  $X^2$  statistic from the likelihood ratio test when comparing to the demographics only model is 1.57 with 1 degree of freedom and a corresponding p-value of 0.2096.

<sup>f</sup>The  $X^2$  statistic from the likelihood ratio test when comparing to the demographics only model is 7.42 with 11 degrees of freedom and a corresponding p-value of 0.7637.

<sup>g</sup>The  $X^2$  statistic from the likelihood ratio test when comparing to the demographics only model is 14.28 with 10 degrees of freedom and a corresponding p-value of 0.1608.

<sup>h</sup>The  $X^2$  statistic from the likelihood ratio test when comparing to the demographics only model is 0.71 with 1 degree of freedom and a corresponding p-value of 0.3990.

<sup>i</sup>The  $X^2$  statistic from the likelihood ratio test when comparing to the demographics only model is 14.66 with 11 degrees of freedom and a corresponding p-value of 0.1984.

<sup>j</sup>The  $X^2$  statistic from the likelihood ratio test when comparing to the demographics only model is 17.48 with 10 degrees of freedom and a corresponding p-value of 0.0644.

<sup>k</sup>The  $X^2$  statistic from the likelihood ratio test when comparing to the demographics only model is 0.19 with 1 degree of freedom and a corresponding p-value of 0.6632.

<sup>l</sup>The  $X^2$  statistic from the likelihood ratio test when comparing to the demographics only model is 17.73 with 11 degrees of freedom and a corresponding p-value of 0.0882.

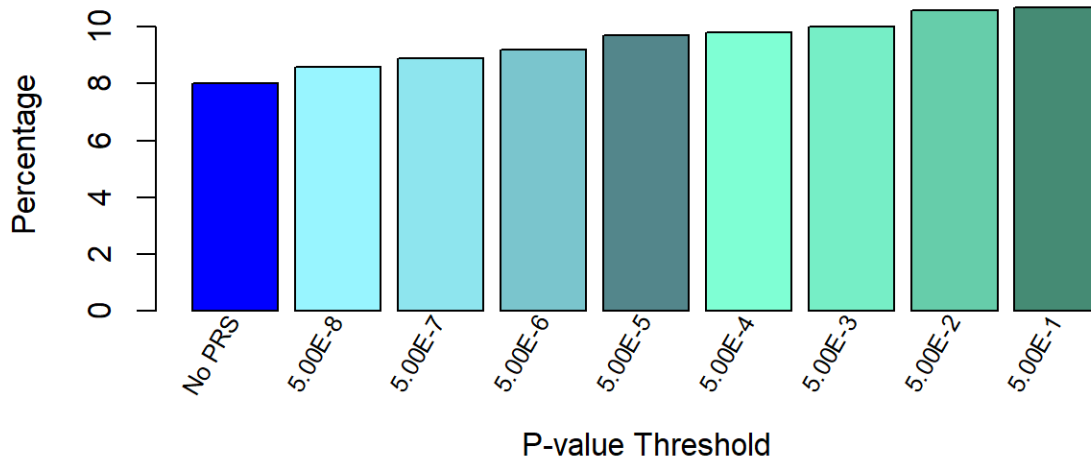

**Supplemental Figure 1. Models using various p-value thresholds to predict ever smoking within European Americans in the ARIC dataset.**

The p-values represent the SNP inclusion threshold of GWAS summary statistics from the GSCAN study. The model adjusted for age, sex, 10 PCs, as well as the ever smoking PRS in one model. The PRS is in z-scores. The percentage represents the total predictability of the exposures (pseudo  $r^2$ ).

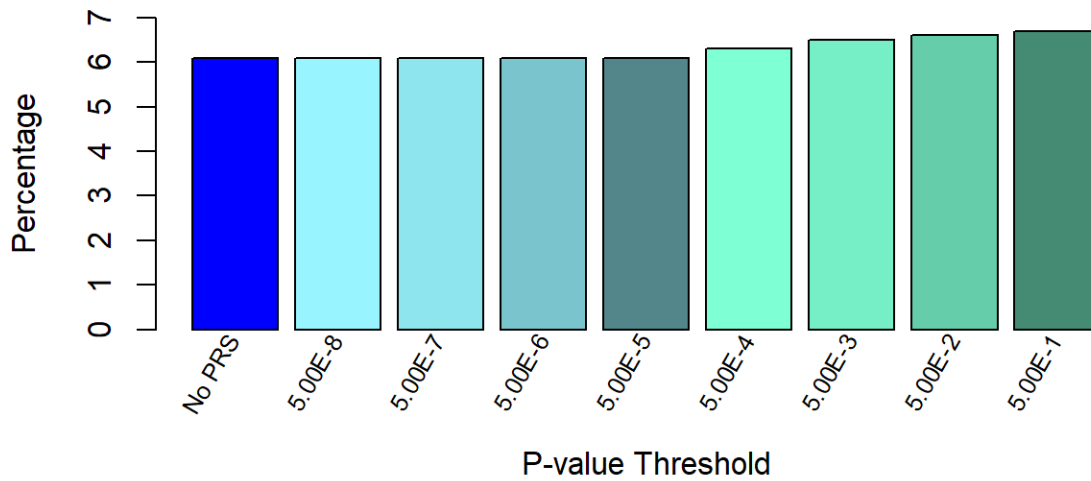

**Supplemental Figure 2. Models using various p-value thresholds to predict early age of smoking initiation (<18 years) within European Americans in the ARIC dataset.**

The p-values represent the SNP inclusion threshold of GWAS summary statistics from the GSCAN study. The model adjusted for age, sex, 10 PCs, as well as the age of smoking initiation PRS in one model. The PRS is in z-scores. The percentage represents the total predictability of the exposures (pseudo  $r^2$ ).

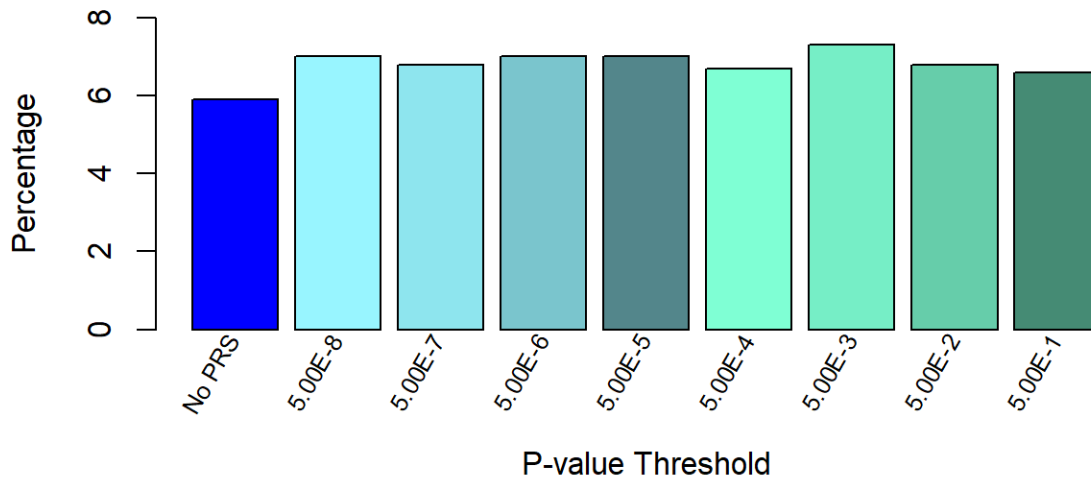

**Supplemental Figure 3. Models using various p-value thresholds to predict heavier smoking ( $\geq 21$  cigarettes smoked per day) within European Americans in the ARIC dataset.** The p-values represent the SNP inclusion threshold of GWAS summary statistics from the GSCAN study. The model adjusted for age, sex, 10 PCs, as well as the cigarettes smoked per day PRS in one model. The PRS is in z-scores. The percentage represents the total predictability of the exposures (pseudo  $r^2$ ).

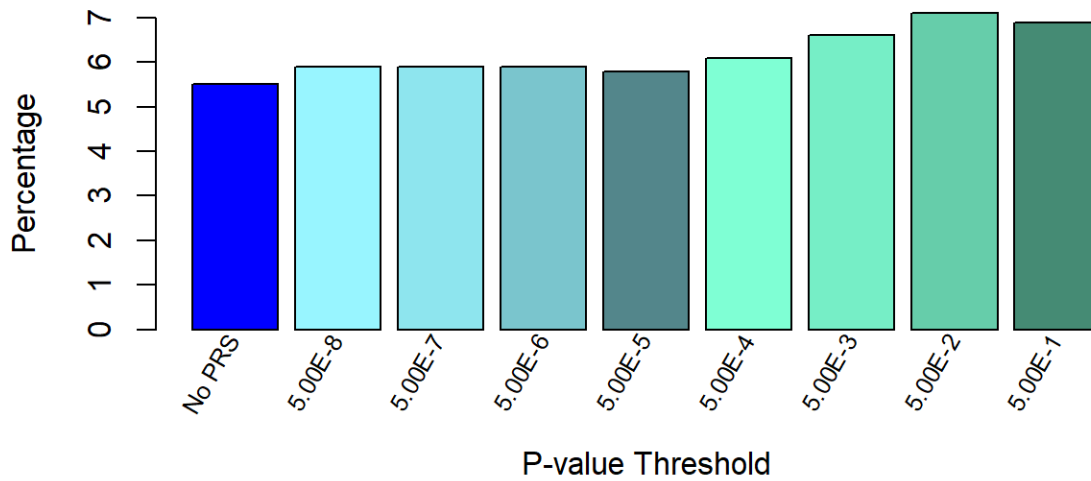

**Supplemental Figure 4. Models using various p-value thresholds to predict smoking cessation within European Americans in the ARIC dataset.**

The p-values represent the SNP inclusion threshold of GWAS summary statistics from the GSCAN study. The model adjusted for age, sex, 10 PCs, as well as the smoking cessation PRS in one model. The PRS is in z-scores. The percentage represents the total predictability of the exposures (pseudo  $r^2$ ).

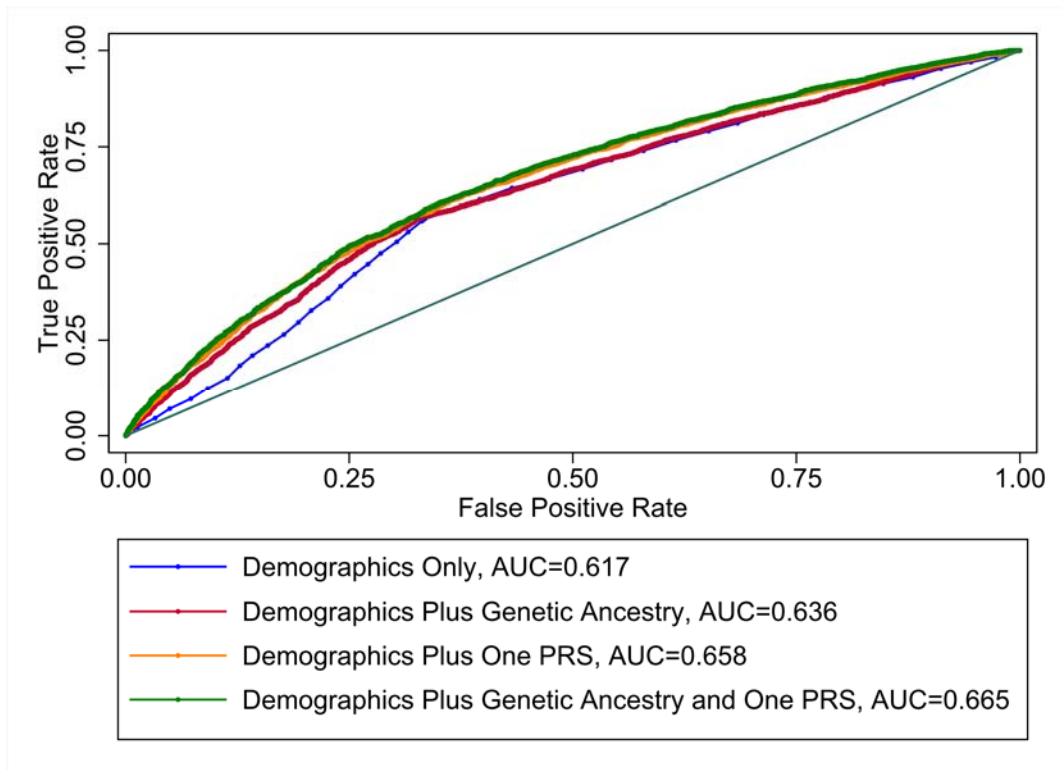

**Supplemental Figure 5. ROC curves for predicting ever smoking within European Americans in the ARIC dataset.**

Demographics Only: adjusting for age and sex.

Demographics Plus Genetic Ancestry: adjusting for age, sex, and 10 PCs.

Demographics Plus one PRS: adjusting for age, sex, and 10 PCs as well as the ever smoking PRS. The PRS is in z-scores.

Demographics Plus Genetic Ancestry and one PRS: adjusting for age, sex, and 10 PCs as well as the ever smoking PRS. The PRS is in z-scores.



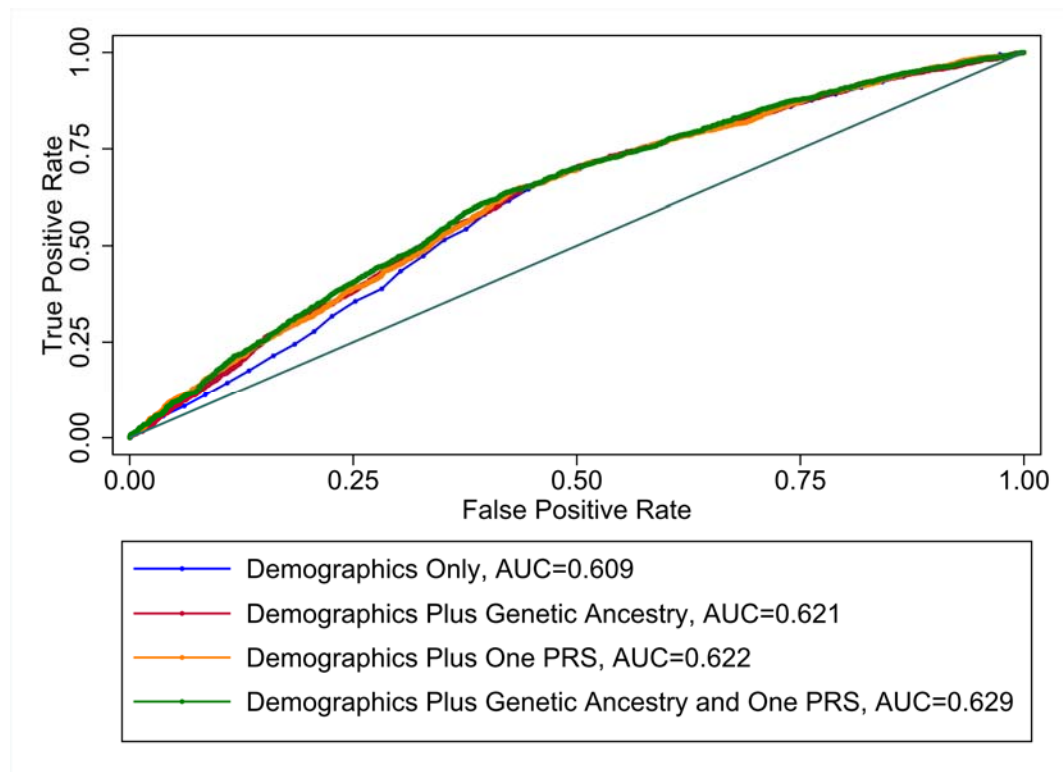

**Supplemental Figure 6. ROC curves for predicting early age of smoking initiation (<18 years) within European Americans in the ARIC dataset.**

Demographics Only: adjusting for age and sex.

Demographics Plus Genetic Ancestry: adjusting for age, sex, and 10 PCs.

Demographics Plus one PRS: adjusting for age, sex, and 10 PCs as well as the age of smoking initiation PRS. The PRS is in z-scores.

Demographics Plus Genetic Ancestry and one PRS: adjusting for age, sex, and 10 PCs as well as the age of smoking initiation PRS. The PRS is in z-scores.

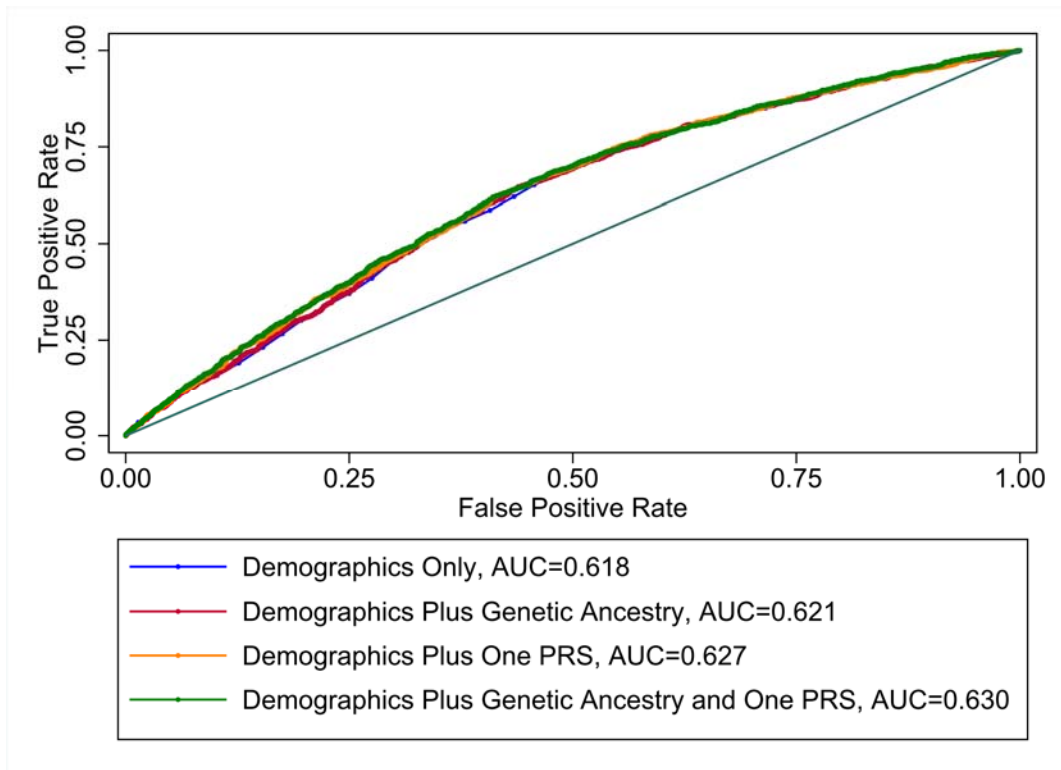

**Supplemental Figure 7. ROC curves for predicting heavier smoking ( $\geq 21$  cigarettes smoked per day) within European Americans in the ARIC dataset.**

Demographics Only: adjusting for age and sex.

Demographics Plus Genetic Ancestry: adjusting for age, sex, and 10 PCs.

Demographics Plus Genetic Ancestry and one PRS: adjusting for age, sex, and 10 PCs as well as the cigarettes smoked per day PRS. The PRS is in z-scores.

Demographics Plus Genetic Ancestry and one PRS: adjusting for age, sex, and 10 PCs as well as the cigarettes smoked per day PRS. The PRS is in z-scores.

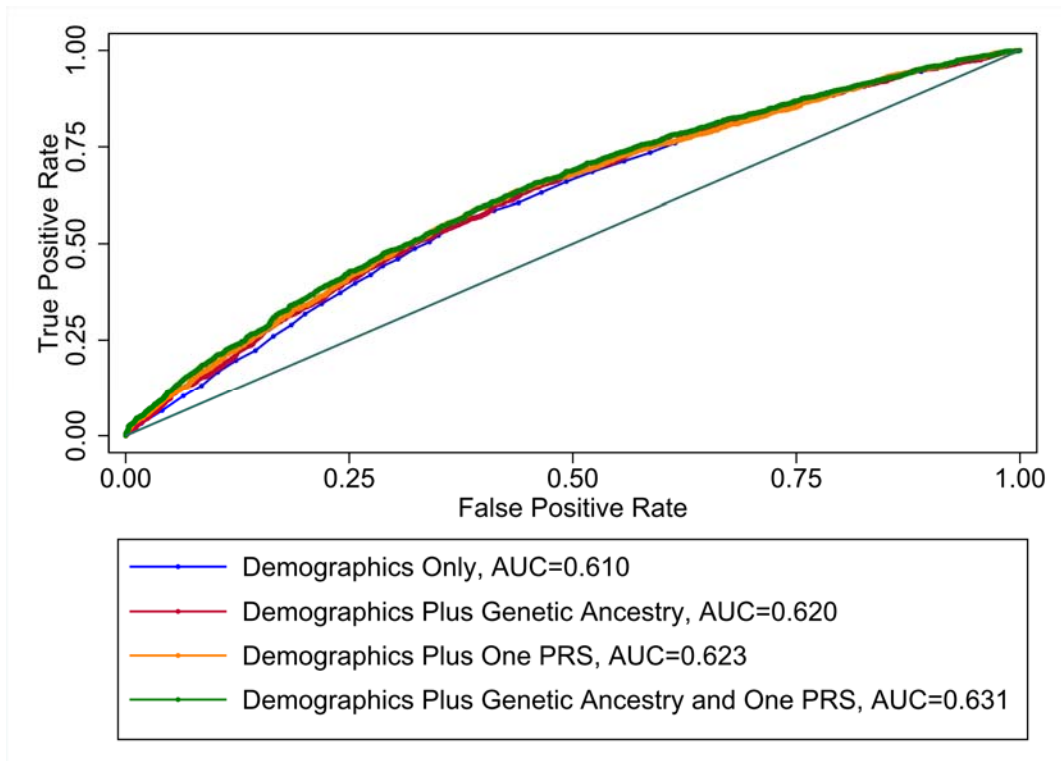

**Supplemental Figure 8. ROC curves for predicting smoking cessation within European Americans in the ARIC dataset.**

Demographics Only: adjusting for age and sex.

Demographics Plus Genetic Ancestry: adjusting for age, sex, and 10 PCs.

Demographics Plus Genetic Ancestry and one PRS: adjusting for age, sex, and 10 PCs as well as the smoking cessation PRS. The PRS is in z-scores.

Demographics Plus Genetic Ancestry and one PRS: adjusting for age, sex, and 10 PCs as well as the smoking cessation PRS. The PRS is in z-scores.

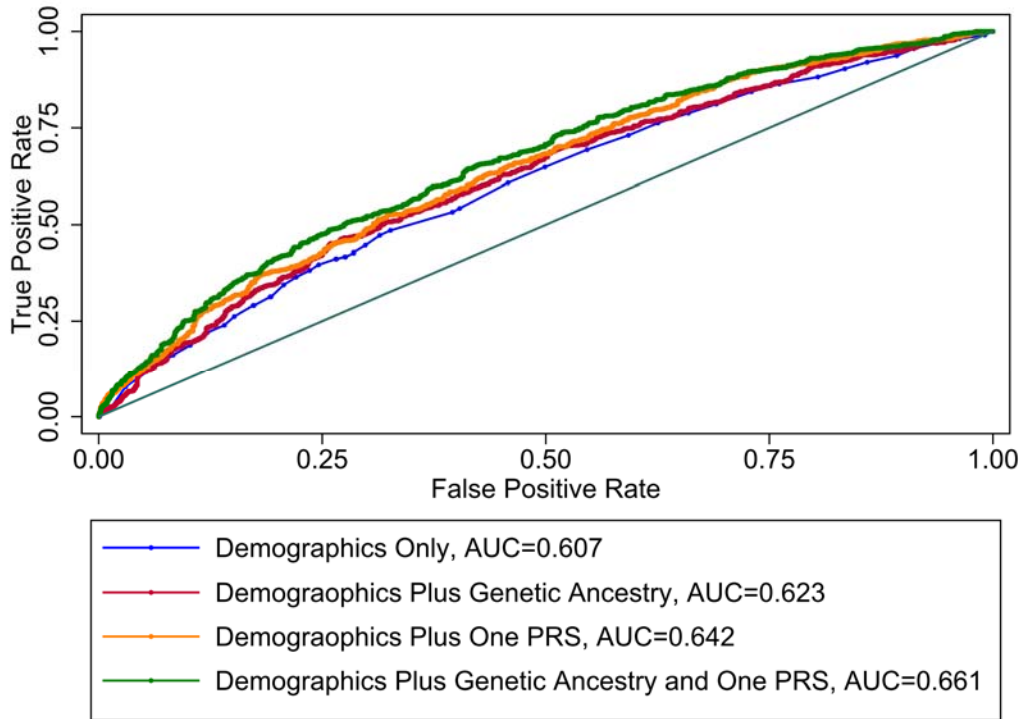

**Supplemental Figure 9. ROC curves for predicting nicotine dependence within European Americans in the COGEN dataset.**

Demographics Only: adjusting for age and sex.

Demographics Plus Genetic Ancestry: adjusting for age, sex, and 10 PCs.

Demographics Plus one PRS: adjusting for age, sex, and 10 PCs as well as the cigarettes smoked per day PRS. The PRS is in z-scores.

Demographics Plus Genetic Ancestry and one PRS: adjusting for age, sex, and 10 PCs as well as the cigarettes smoked per day PRS. The PRS is in z-scores.

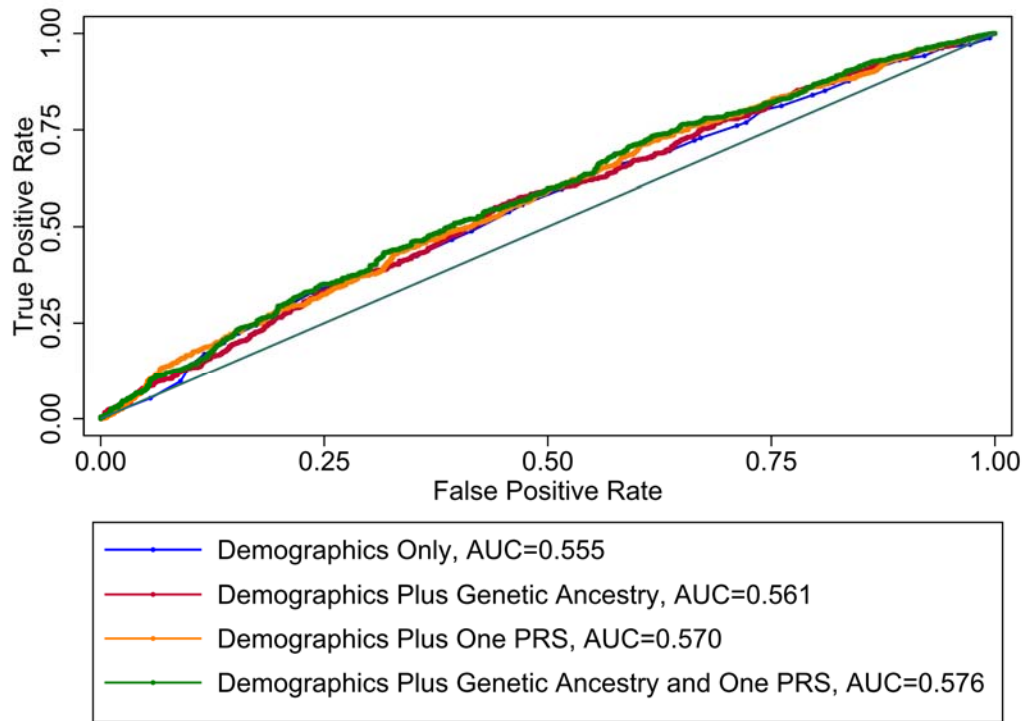

**Supplemental Figure 10. ROC curves for predicting early age of smoking initiation (<14 years) within European Americans in the COGEN dataset.**

Demographics Only: adjusting for age and sex.

Demographics Plus Genetic Ancestry: adjusting for age, sex, and 10 PCs.

Demographics Plus one PRS: adjusting for age, sex, and 10 PCs as well as the age of smoking initiation PRS. The PRS is in z-scores.

Demographics Plus Genetic Ancestry and one PRS: adjusting for age, sex, and 10 PCs as well as the age of smoking initiation PRS. The PRS is in z-scores.

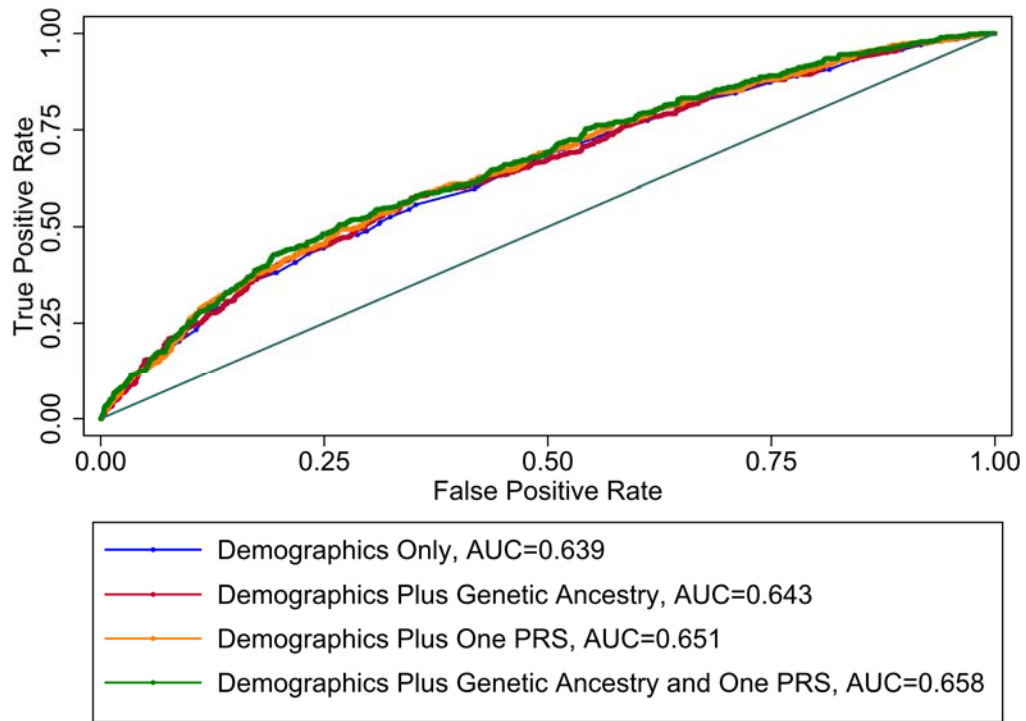

**Supplemental Figure 11. ROC curves for predicting heavier smoking ( $\geq 21$  cigarettes smoked per day) within European Americans in the COGEND dataset.**

Demographics Only: adjusting for age and sex.

Demographics Plus Genetic Ancestry: adjusting for age, sex, and 10 PCs.

Demographics Plus Genetic Ancestry and one PRS: adjusting for age, sex, and 10 PCs as well as the cigarettes smoked per day PRS. The PRS is in z-scores.

Demographics Plus Genetic Ancestry and one PRS: adjusting for age, sex, and 10 PCs as well as the cigarettes smoked per day PRS. The PRS is in z-scores.

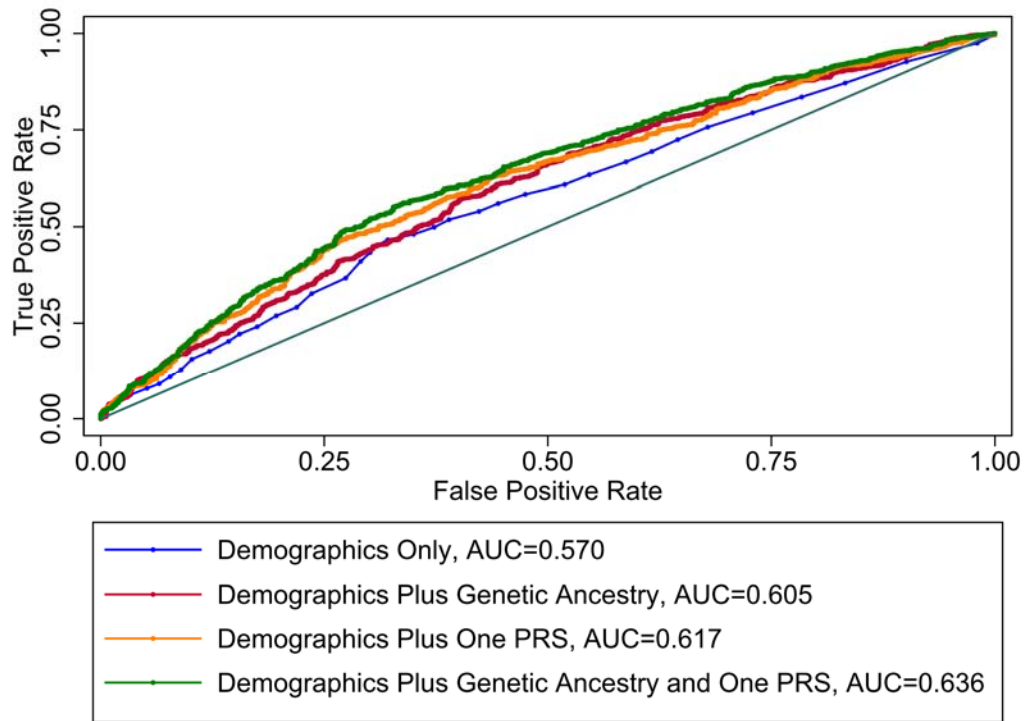

**Supplemental Figure 12. ROC curves for predicting smoking cessation within European Americans in the COGEND dataset.**

Demographics Only: adjusting for age and sex.

Demographics Plus Genetic Ancestry: adjusting for age, sex, and 10 PCs.

Demographics Plus Genetic Ancestry and one PRS: adjusting for age, sex, and 10 PCs as well as the smoking cessation PRS. The PRS is in z-scores.

Demographics Plus Genetic Ancestry and one PRS: adjusting for age, sex, and 10 PCs as well as the smoking cessation PRS. The PRS is in z-scores.

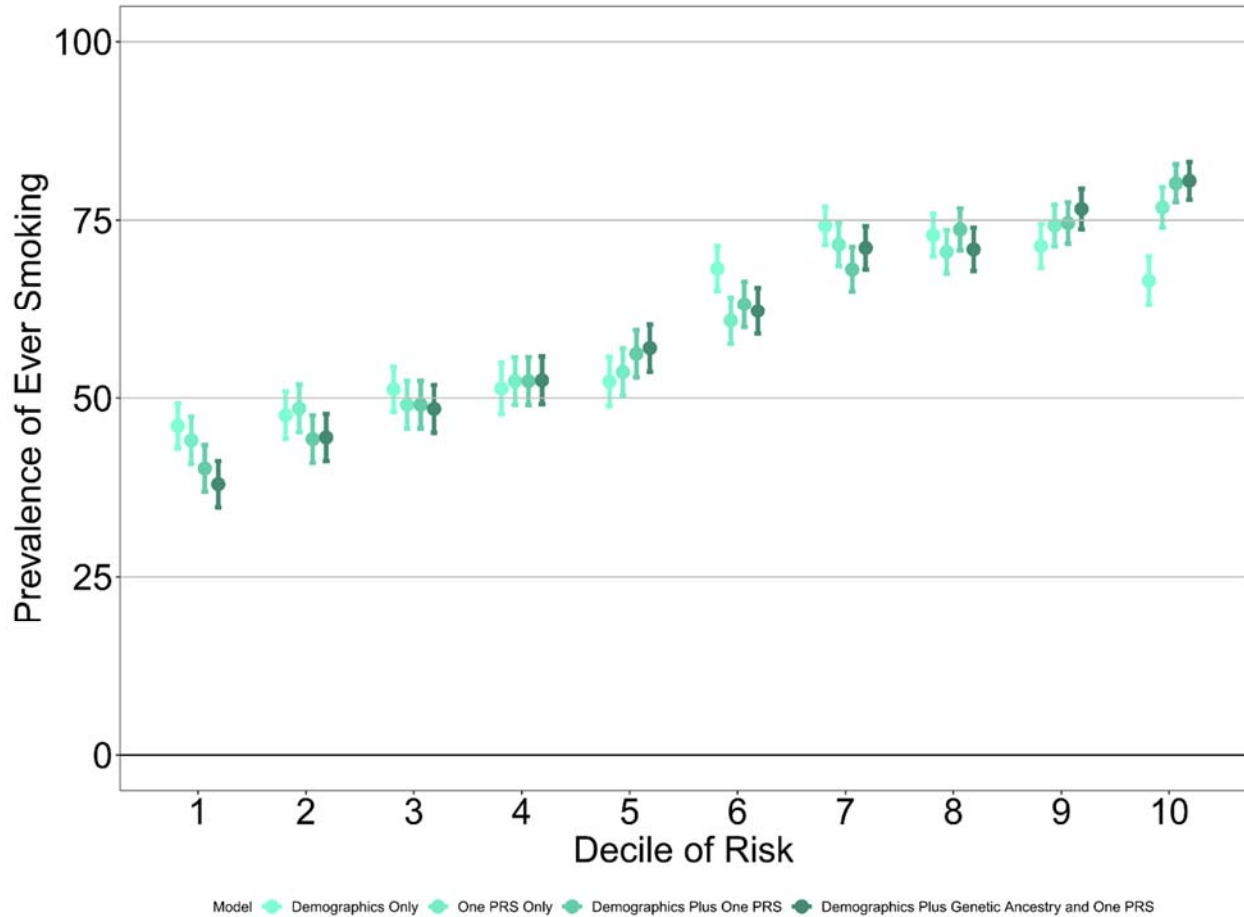

**Supplemental Figure 13. Mean Prevalence of ever smoking stratified by deciles of risk within European Americans in the ARIC dataset.**

The demographics only model included age and sex only. The demographics plus genetic ancestry includes age, sex, and 10 PCs. The demographics plus one PRS includes age, sex, and the ever smoking PRS. The demographics plus genetic ancestry and one PRS includes age, sex, 10 PCs, and the ever smoking PRS. The decile of risk was estimated for each individual for each model. The prevalence of ever smoking was calculated within each decile independently. The 95% confidence interval was estimated from the prevalence and sample size of each decile.



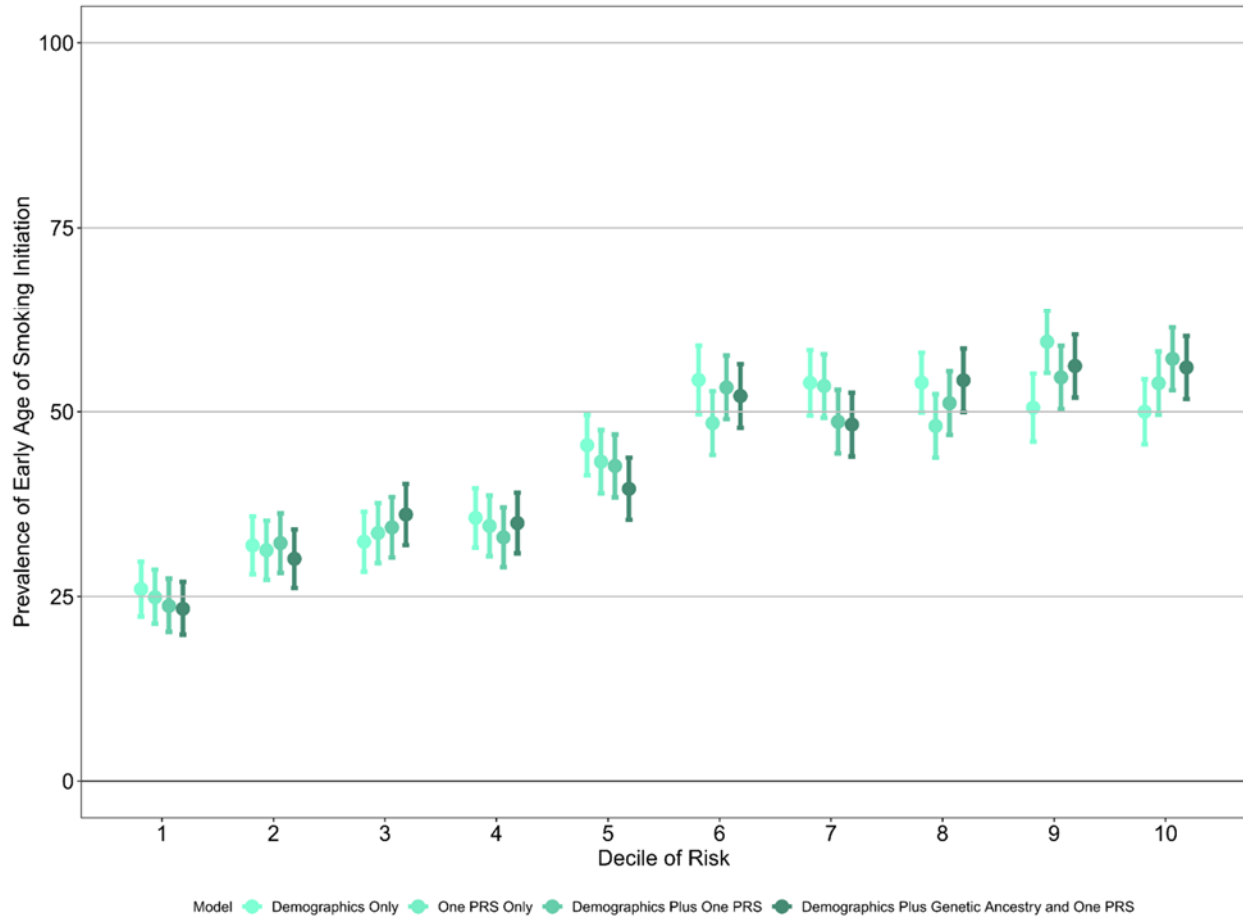

**Supplemental Figure 14. Mean Prevalence of early age of smoking initiation (<18 years) stratified by deciles of risk within European Americans in the ARIC dataset.**

The demographics only model included age and sex only. The demographics plus genetic ancestry includes age, sex, and 10 PCs. The demographics plus one PRS includes age, sex, and the age of smoking initiation PRS. The demographics plus genetic ancestry and one PRS includes age, sex, 10 PCs, and the age of smoking initiation PRS. The decile of risk was estimated for each individual for each model. The prevalence of ever smoking was calculated within each decile independently. The 95% confidence interval was estimated from the prevalence and sample size of each decile.

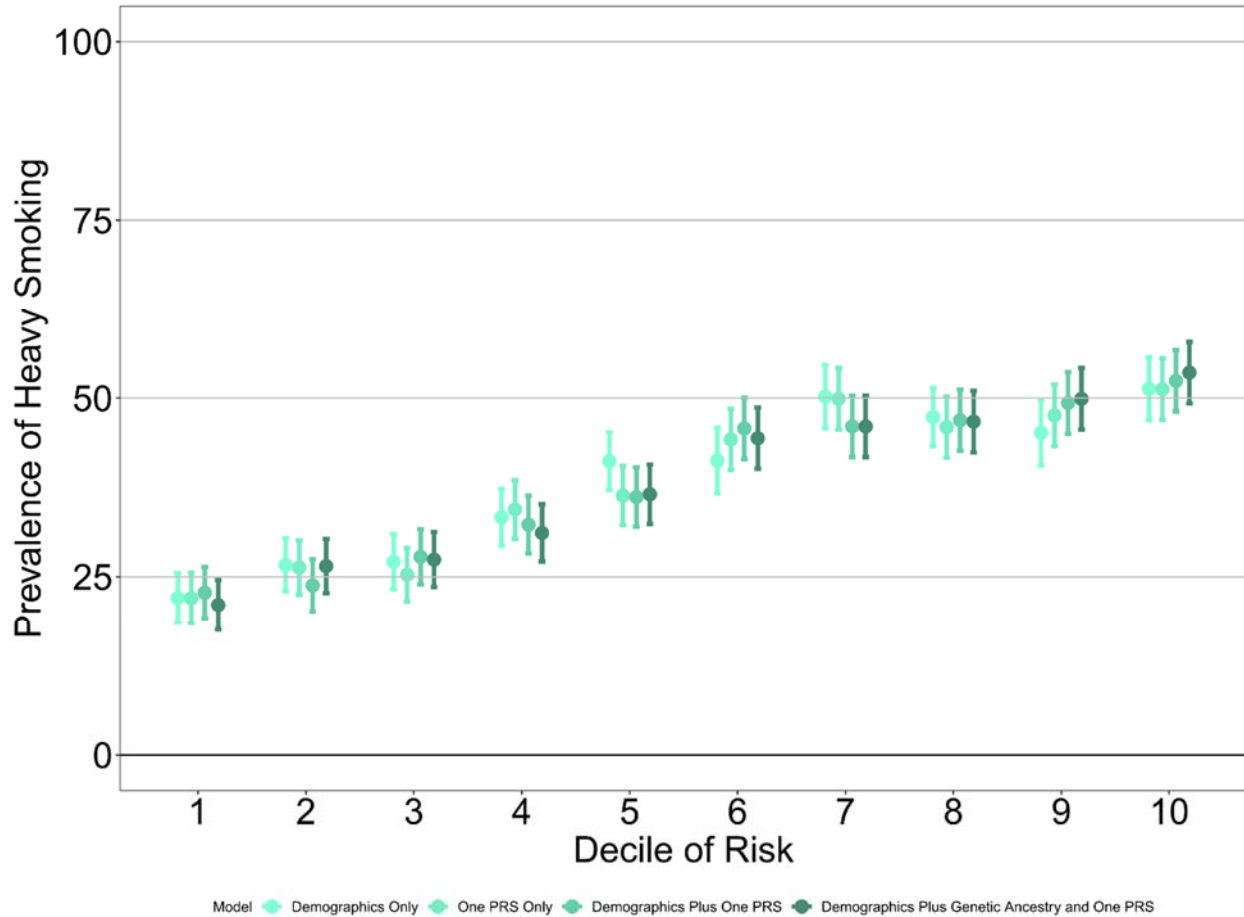

**Supplemental Figure 15. Mean Prevalence for heavier smoking ( $\geq 21$  cigarettes smoked per day) stratified by deciles of risk within European Americans in the ARIC dataset.**

The demographics only model included age and sex only. The demographics plus genetic ancestry includes age, sex, and 10 PCs. The demographics plus one PRS includes age, sex, and the cigarettes smoked per day PRS. The demographics plus genetic ancestry and one PRS includes age, sex, 10 PCs, and the cigarettes smoked per day PRS. The decile of risk was estimated for each individual for each model. The prevalence of ever smoking was calculated within each decile independently. The 95% confidence interval was estimated from the prevalence and sample size of each decile.

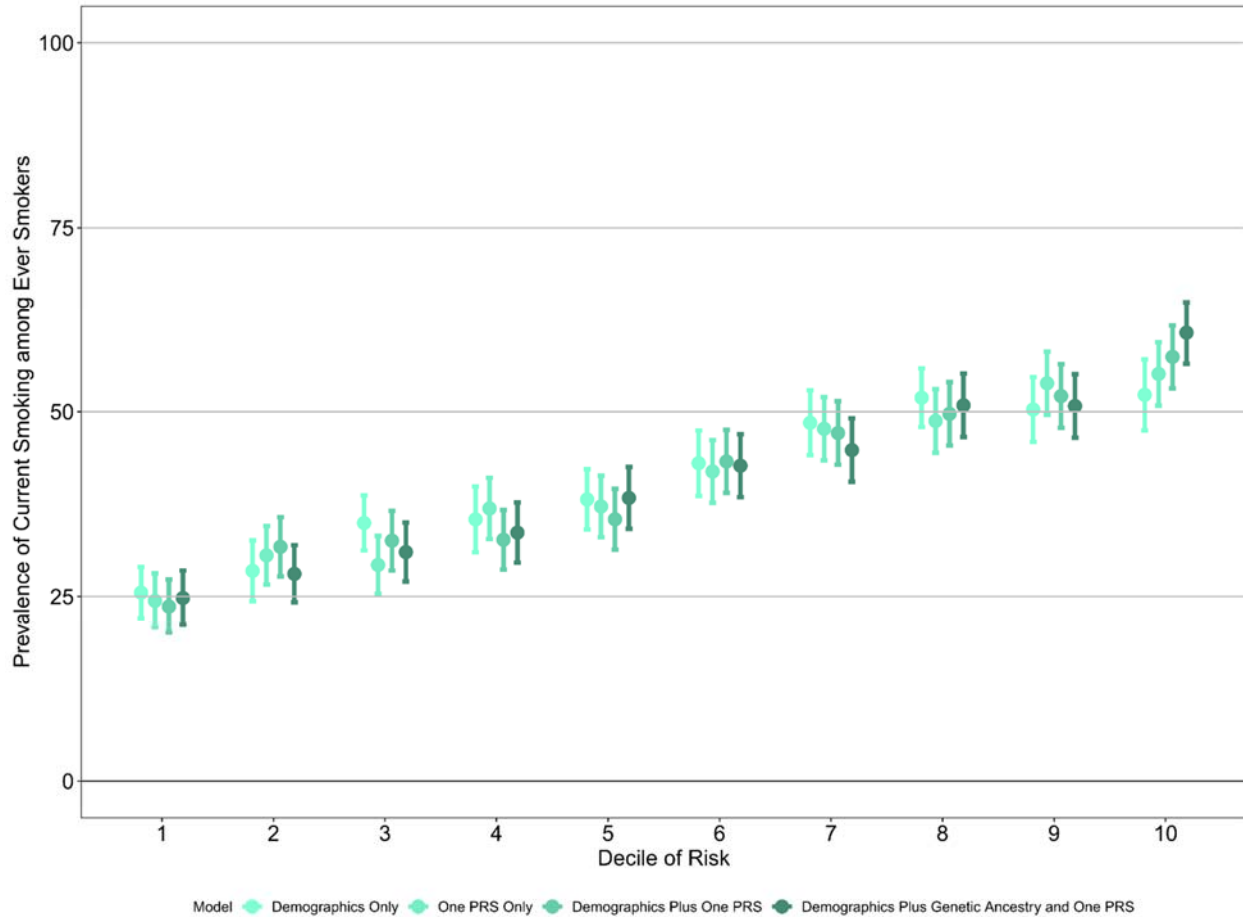

**Supplemental Figure 16. Mean Prevalence for smoking cessation among ever smokers stratified by deciles of risk within European Americans in the ARIC dataset.**

The demographics only model included age and sex only. The demographics plus genetic ancestry includes age, sex, and 10 PCs. The demographics plus one PRS includes age, sex, and the smoking cessation PRS. The demographics plus genetic ancestry and one PRS includes age, sex, 10 PCs, and the smoking cessation PRS. The decile of risk was estimated for each individual for each model. The prevalence of ever smoking was calculated within each decile independently. The 95% confidence interval was estimated from the prevalence and sample size of each decile.

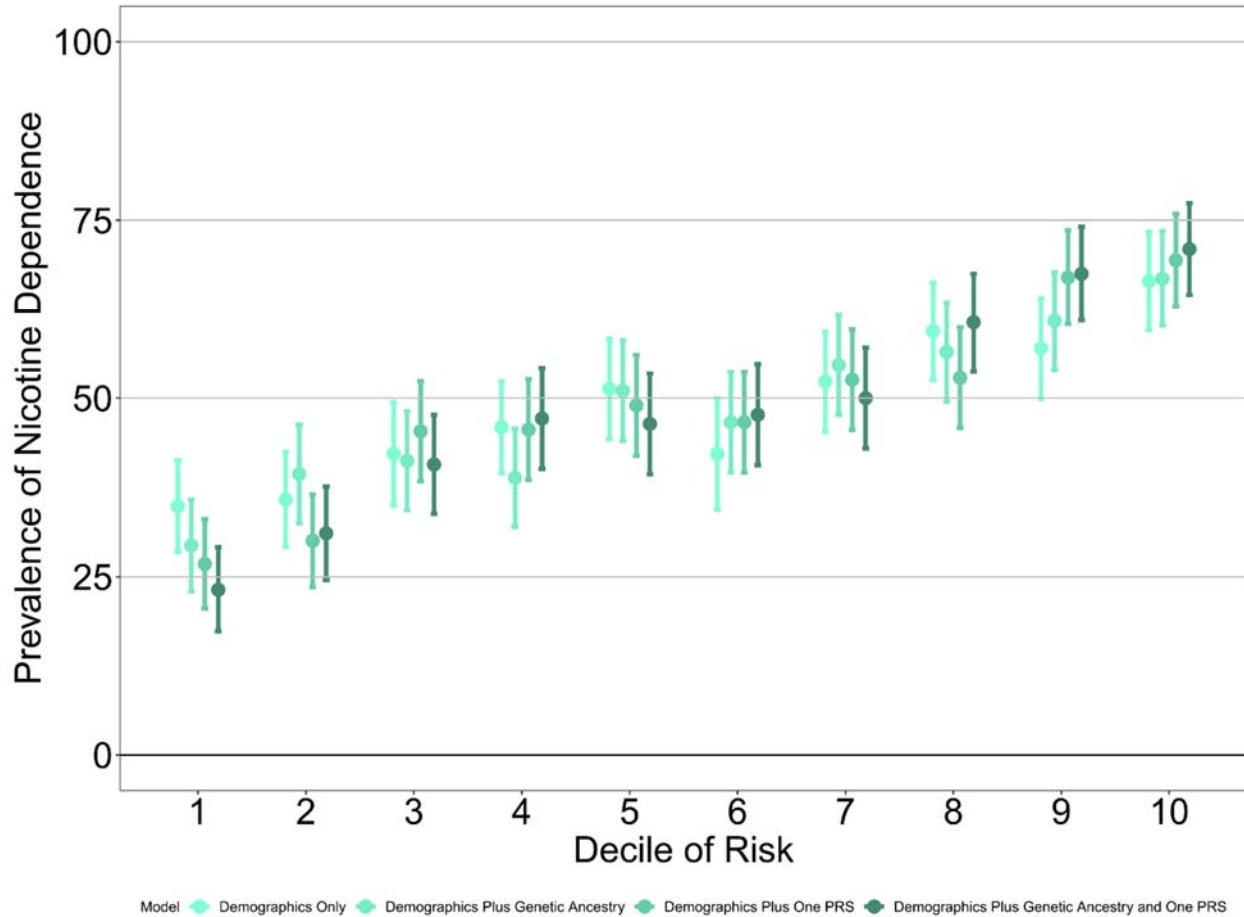

**Supplemental Figure 17. Mean Prevalence of nicotine dependence stratified by deciles of risk within European Americans in the COGEN dataset.**

The demographics only model included age and sex only. The demographics plus genetic ancestry includes age, sex, and 10 PCs. The demographics plus one PRS includes age, sex, and the cigarettes smoked per day PRS. The demographics plus genetic ancestry and one PRS includes age, sex, 10 PCs, and the cigarettes smoked per day PRS. The decile of risk was estimated for each individual for each model. The prevalence of ever smoking was calculated within each decile independently. The 95% confidence interval was estimated from the prevalence and sample size of each decile.

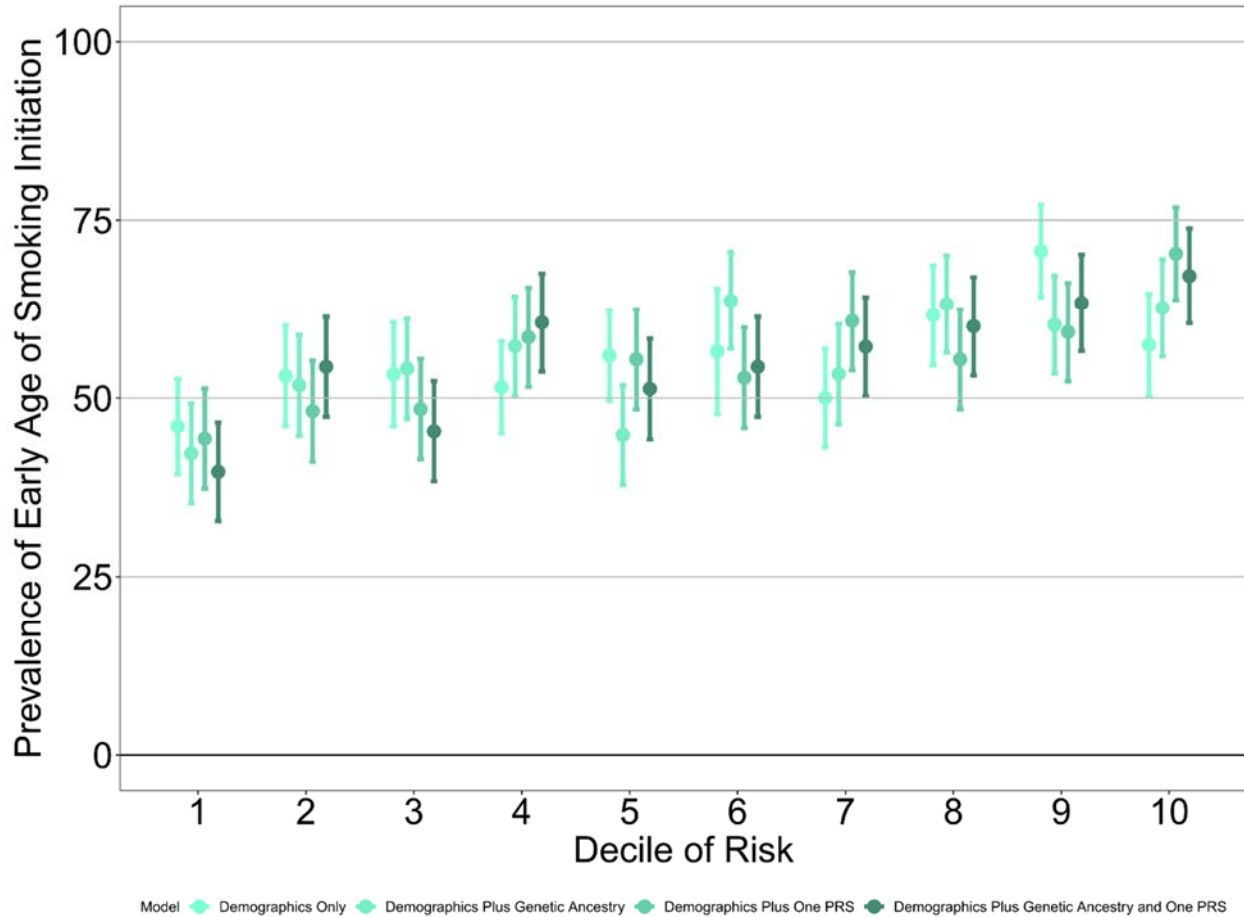

**Supplemental Figure 18. Mean Prevalence of early age of smoking initiation (<14 years) stratified by deciles of risk within European Americans in the COGEN dataset.**

The demographics only model included age and sex only. The demographics plus genetic ancestry includes age, sex, and 10 PCs. The demographics plus one PRS includes age, sex, and the age of smoking initiation PRS. The demographics plus genetic ancestry and one PRS includes age, sex, 10 PCs, and the age of smoking initiation PRS. The decile of risk was estimated for each individual for each model. The prevalence of ever smoking was calculated within each decile independently. The 95% confidence interval was estimated from the prevalence and sample size of each decile.

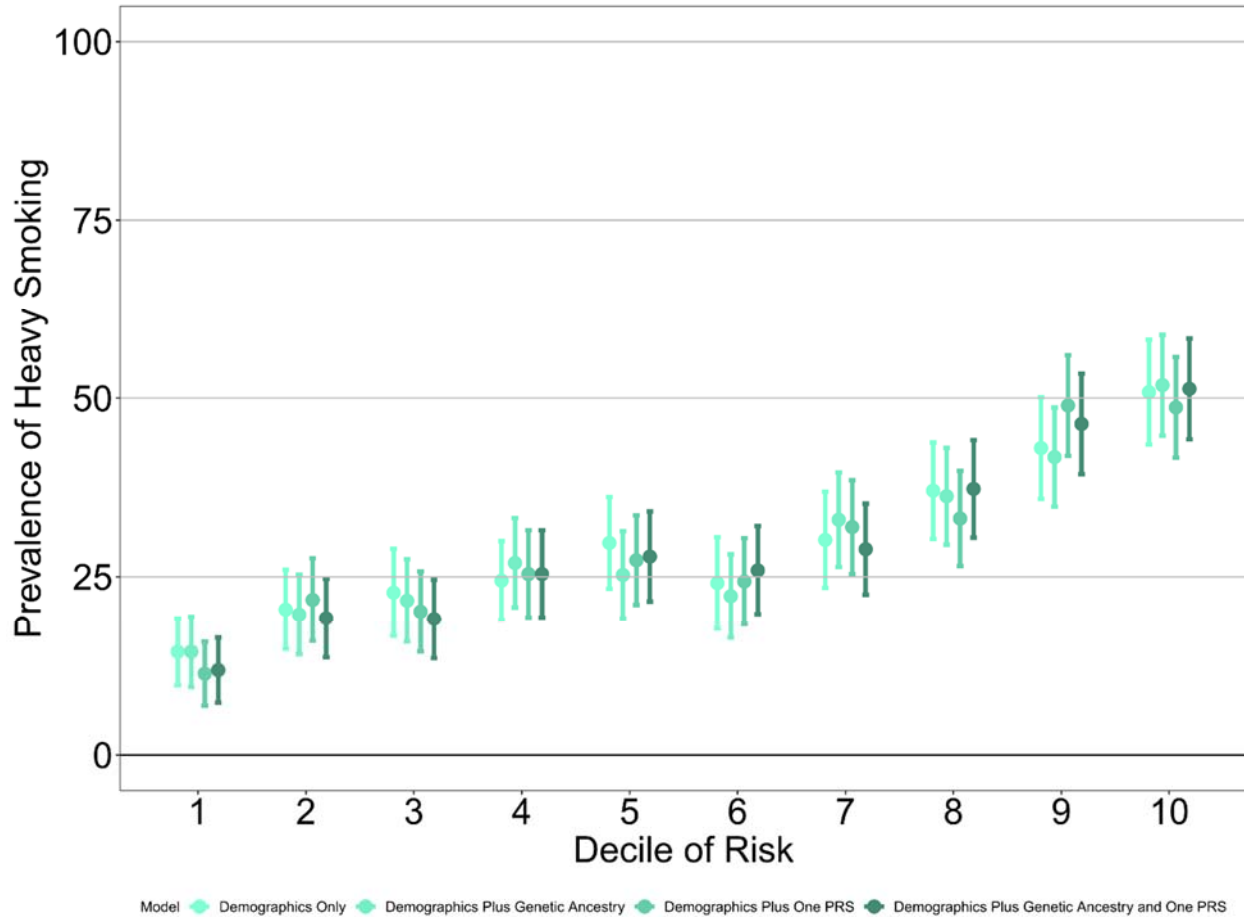

**Supplemental Figure 19. Mean Prevalence for heavier smoking ( $\geq 21$  cigarettes smoked per day) stratified by deciles of risk within European Americans in the COGEN dataset.**

The demographics only model included age and sex only. The demographics plus genetic ancestry includes age, sex, and 10 PCs. The demographics plus one PRS includes age, sex, and the cigarettes smoked per day PRS. The demographics plus genetic ancestry and one PRS includes age, sex, 10 PCs, and the cigarettes smoked per day PRS. The decile of risk was estimated for each individual for each model. The prevalence of ever smoking was calculated within each decile independently. The 95% confidence interval was estimated from the prevalence and sample size of each decile.

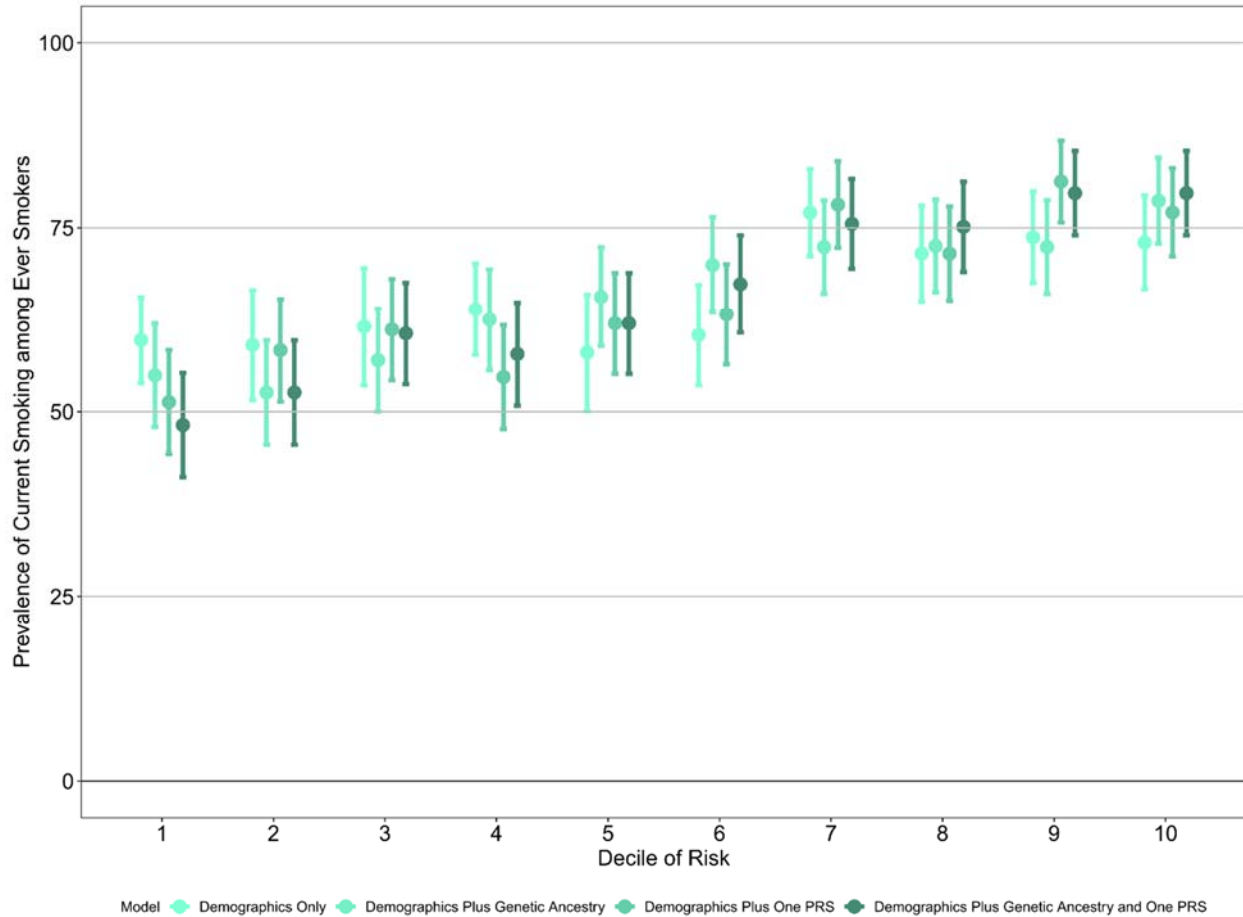

**Supplemental Figure 20. Mean Prevalence for smoking cessation among ever smokers stratified by deciles of risk within European Americans in the COGEN dataset.**

The demographics only model included age and sex only. The demographics plus genetic ancestry includes age, sex, and 10 PCs. The demographics plus one PRS includes age, sex, and the smoking cessation PRS. The demographics plus genetic ancestry and one PRS includes age, sex, 10 PCs, and the smoking cessation PRS. The decile of risk was estimated for each individual for each model. The prevalence of ever smoking was calculated within each decile independently. The 95% confidence interval was estimated from the prevalence and sample size of each decile.
